# Supplementary material for: A Virtual Reality-Based Self-Help Intervention for Dealing with the Psychological Distress Associated with the COVID-19 Lockdown: An Effectiveness Study with a Two-Week Follow-Up
Source: MDPI journal article supplement (doi:10.3390/ijerph18158188), 2021-08-02
Supplement: s1 [file s1]

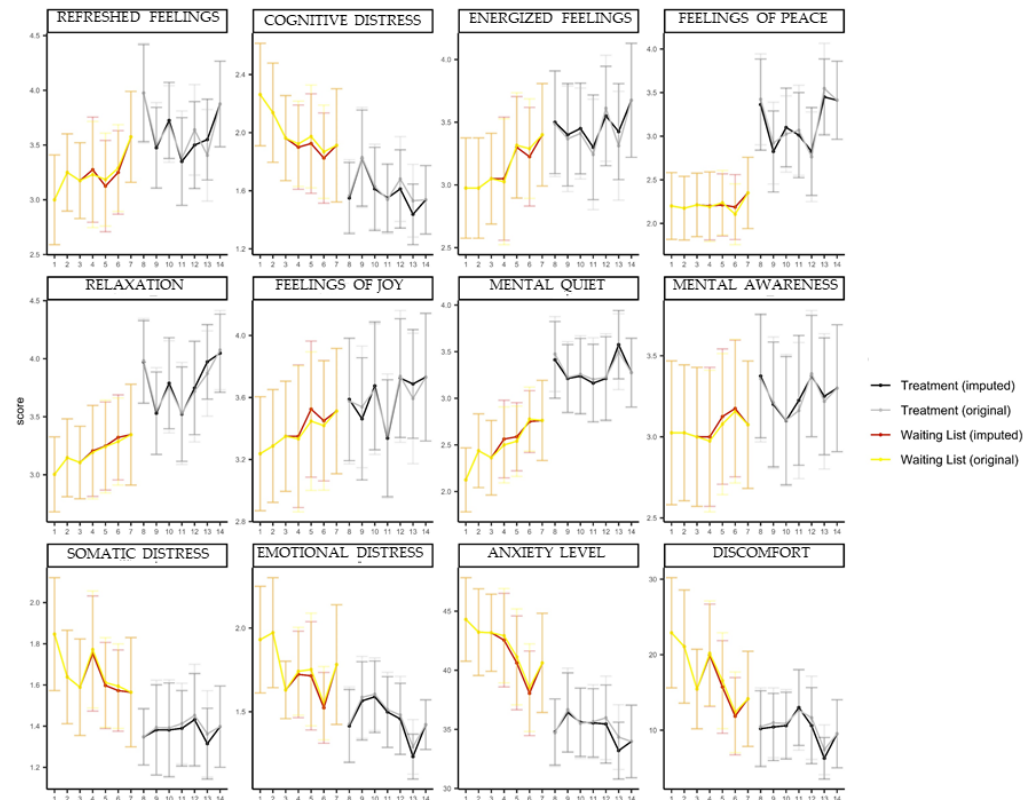

**Figure S1.** Results of imputation with random forest algorithm compared to real values. Daily changes in the subjective experience (refreshed feelings, SRSI3- Rest/Refresh; energized feelings; SRSI3- Energized, relaxation SRSI3 - Physical relaxation; feelings of peace, SRSI3- At ease/peace; feelings of joy, SRSI3- Joy; mental quiet, SRSI3- Mental quiet; mental awareness, SRSI3- Aware; somatic stress, SRSI3- Somatic stress; emotional stress, SRSI3- Emotional stress; cognitive stress, SRSI3- Cognitive stress; anxiety level, State-Trait Anxiety Inventory- State - STAI-S; discomfort,

Subjective Units of Distress Scale SUDS). State measures collected each day during the waiting week (7 days before the start of the intervention) and during the intervention phase, after each treatment module. Mean and 95% CI are depicted in the graphs.

**Table S1.** Estimated parameters for Linear Mixed Models fitted for primary outcome measures. For all variables, the first model (model 1) was run according to the formula= Outcome ~ 1 | ID; the second model (model 2) was run according to the following formula = Outcome ~ Time= 1 | ID, and the third model (model 3) according to this formula = Outcome ~ Time\*Modality = 1 | ID.

| Variables                      |         | AIC     | BIC    | logLik  | deviance | Chisq   | Pr(>Chisq) |
|--------------------------------|---------|---------|--------|---------|----------|---------|------------|
| Depression Symptoms            | Model 1 | 996.33  | 1005.5 | -495.16 | 990.33   |         |            |
|                                | Model 2 | 983.39  | 1001.8 | -485.69 | 971.39   | 18.9405 | 0.0002813  |
|                                | Model 3 | 989.22  | 1019.8 | -484.61 | 969.22   | 2.169   | 0.7045820  |
| Anxiety Symptoms               | Model 1 | 871.49  | 880.67 | -432.74 | 865.49   |         |            |
|                                | Model 2 | 870.74  | 889.12 | -429.37 | 858.74   | 6.7425  | 0.08057    |
|                                | Model 3 | 873.71  | 904.33 | -426.85 | 853.71   | 5.0383  | 0.28340    |
| Stress Symptoms                | Model 1 | 1060.8  | 1070.0 | -527.42 | 1054.8   |         |            |
|                                | Model 2 | 1048.8  | 1067.2 | -518.40 | 1036.8   | 18.0521 | 0.0004291  |
|                                | Model 3 | 1051.7  | 1082.3 | -515.83 | 1031.7   | 5.1449  | 0.2727492  |
| General distress               | Model 1 | 1068.3  | 1077.5 | -531.14 | 1062.3   |         |            |
|                                | Model 2 | 1054.6  | 1073.0 | -521.29 | 1042.6   | 19.6908 | 0.0001967  |
|                                | Model 3 | 1057.7  | 1088.3 | -518.83 | 1037.7   | 4.9248  | 0.2950959  |
| Perceived stress level (       | Model 1 | 973.02  | 982.21 | -483.51 | 967.02   |         |            |
|                                | Model 2 | 964.16  | 982.54 | -476.08 | 952.16   | 14.8570 | 0.001943   |
|                                | Model 3 | 966.58  | 997.20 | -473.29 | 946.58   | 5.5871  | 0.232182   |
| Perceived hopelessness         | Model 1 | 685.89  | 695.07 | -339.94 | 679.89   |         |            |
|                                | Model 2 | 677.97  | 696.34 | -332.98 | 665.97   | 13.9168 | 0.003021   |
|                                | Model 3 | 684.88  | 715.51 | -332.44 | 664.88   | 1.0851  | 0.896630   |
| Perceived social connectedness | Model 1 | 1004.06 | 1013.2 | -499.03 | 998.06   |         |            |
|                                | Model 2 | 994.32  | 1012.7 | -491.16 | 982.32   | 15.744  | 0.001279   |

|                     |         |        |        |         |        |         |          |
|---------------------|---------|--------|--------|---------|--------|---------|----------|
| Fear of Coronavirus | Model 3 | 997.32 | 1028.0 | -488.66 | 977.32 | 4.994   | 0.287913 |
|                     | Model 1 | 819.49 | 828.68 | -406.75 | 813.49 |         |          |
|                     | Model 2 | 810.96 | 829.34 | -399.48 | 798.96 | 14.5296 | 0.002266 |
|                     | Model 3 | 818.77 | 849.40 | -399.39 | 798.77 | 0.1933  | 0.995621 |

---

**Table S2.** Estimated parameters for Linear Mixed Models fitted for state outcome measures. For all variables, the first model (model 1) was run according to the formula= Outcome ~ 1 | ID; the second model (model 2) was run according to the following formula = Outcome ~ Time= 1 | ID, and the third model (model 3) according to this formula = Outcome ~ Time\*Immersion = 1 | ID.

| Variables                     |         | AIC    | BIC    | logLik   | deviance | Chisq   | Pr(>Chisq) |
|-------------------------------|---------|--------|--------|----------|----------|---------|------------|
| Anxiety level                 | Model 1 | 576.07 | 583.22 | -285.04  | 570.07   |         |            |
|                               | Model 2 | 549.64 | 559.17 | -270.82  | 541.64   | 28.4353 | 9.688e-08  |
|                               | Model 3 | 552.68 | 566.97 | -270.34  | 540.68   | 0.9573  | 0.6196     |
| Refreshed feelings            | Model 1 | 196.30 | 203.44 | -95.148  | 190.30   |         |            |
|                               | Model 2 | 190.67 | 200.19 | -91.333  | 182.67   | 7.6300  | 0.00574    |
|                               | Model 3 | 189.86 | 204.15 | -88.930  | 177.86   | 4.8064  | 0.09043    |
| Energized feelings            | Model 1 | 202.68 | 209.82 | -98.338  | 196.68   |         |            |
|                               | Model 2 | 199.35 | 208.88 | -95.674  | 191.35   | 5.3280  | 0.02099    |
|                               | Model 3 | 200.86 | 215.15 | -94.428  | 188.86   | 2.4923  | 0.28760    |
| Perceived physical relaxation | Model 1 | 255.62 | 262.76 | -124.81  | 249.62   |         |            |
|                               | Model 2 | 237.20 | 246.72 | -114.60  | 229.20   | 20.4223 | 6.21e-06   |
|                               | Model 3 | 240.81 | 255.10 | -114.41  | 228.81   | 0.3837  | 0.8254     |
| Feelings of peace             | Model 1 | 420.46 | 427.60 | -207.23  | 414.46   |         |            |
|                               | Model 2 | 417.42 | 426.95 | -204.71  | 409.42   | 5.0330  | 0.02487    |
|                               | Model 3 | 421.29 | 435.58 | -204.65  | 409.29   | 0.1317  | 0.93627    |
| Feelings of joy               | Model 1 | 199.06 | 206.20 | -96.528  | 193.06   |         |            |
|                               | Model 2 | 197.28 | 206.81 | -94.642  | 189.28   | 3.7717  | 0.05213    |
|                               | Model 3 | 199.41 | 213.70 | -93.706  | 187.41   | 1.8721  | 0.39217    |
| Feelings of mental quiet      | Model 1 | 225.20 | 232.34 | -109.599 | 219.20   |         |            |

|                                             |         |        |         |         |        |         |           |
|---------------------------------------------|---------|--------|---------|---------|--------|---------|-----------|
| Feelings of mental awareness                | Model 2 | 203.28 | 212.81  | -97.643 | 195.28 | 23.9131 | 1.008e-06 |
|                                             | Model 3 | 206.55 | 220.84  | -97.274 | 194.55 | 0.7364  | 0.692     |
|                                             | Model 1 | 220.02 | 227.17  | -107.01 | 214.02 |         |           |
| Perceived somatic distress                  | Model 2 | 220.94 | 230.46  | -106.47 | 212.94 | 1.0850  | 0.2976    |
|                                             | Model 3 | 223.94 | 238.23  | -105.97 | 211.94 | 0.9988  | 0.6069    |
|                                             | Model 1 | 98.277 | 105.423 | -46.139 | 92.277 |         |           |
| Perceived emotional distress                | Model 2 | 76.449 | 85.977  | -34.224 | 68.449 | 23.8283 | 1.053e-06 |
|                                             | Model 3 | 78.983 | 93.275  | -33.492 | 66.983 | 1.4655  | 0.4806    |
|                                             | Model 1 | 129.80 | 136.94  | -61.899 | 123.80 |         |           |
| Perceived cognitive stress                  | Model 2 | 118.55 | 128.08  | -55.275 | 110.55 | 13.2477 | 0.0002729 |
|                                             | Model 3 | 122.52 | 136.82  | -55.262 | 110.52 | 0.0262  | 0.9869642 |
|                                             | Model 1 | 161.83 | 168.97  | -77.915 | 155.83 |         |           |
| Subjectively perceived levels of discomfort | Model 2 | 140.18 | 149.70  | -66.088 | 132.18 | 23.653  | 1.154e-06 |
|                                             | Model 3 | 143.78 | 158.07  | -65.889 | 131.78 | 0.399   | 0.8192    |
|                                             | Model 1 | 634.96 | 642.11  | -314.48 | 628.96 |         |           |
|                                             | Model 2 | 616.85 | 626.37  | -304.42 | 608.85 | 20.1127 | 7.301e-06 |
|                                             | Model 3 | 618.43 | 632.72  | -303.21 | 606.43 | 2.4168  | 0.2987    |

---

**Table S3.** Bonferroni adjusted-pairwise comparisons for all primary and secondary outcome measure across the different time points. (7 days before the start of the intervention – Waiting Period, before the start of the intervention, Day 0 – T0; end of the intervention, Day 7 – T1; 2-week follow-up, Day 21 – T2).

| Constrast            | estimate | SE   | df      | t.ratio | p.value      | d     | CI   | CI_low | CI_high | Variables           |
|----------------------|----------|------|---------|---------|--------------|-------|------|--------|---------|---------------------|
| WaitingList - TimeT0 | -0.10    | 0.90 | 121.07  | -0.11   | 1            | -0.01 | 0.95 | -0.18  | 0.16    | Depression Symptoms |
| WaitingList – TimeT1 | 3.10     | 0.90 | 121.07  | 3.41    | <b>0.005</b> | 0.31  | 0.95 | 0.12   | 0.49    | Depression Symptoms |
| WaitingList – TimeT2 | 2.52     | 0.92 | 121.38  | 2.72    | <b>0.043</b> | 0.24  | 0.95 | 0.06   | 0.42    | Depression Symptoms |
| TimeT0 – TimeT1      | 3.20     | 0.90 | 121.07  | 3.52    | <b>0.003</b> | 0.32  | 0.95 | 0.13   | 0.50    | Depression Symptoms |
| Time0 – TimeT2       | 2.62     | 0.92 | 121.38  | 2.83    | <b>0.032</b> | 0.25  | 0.95 | 0.07   | 0.43    | Depression Symptoms |
| TimeT1 – TimeT2      | -0.58    | 0.92 | 121.38  | -0.62   | 1            | -0.05 | 0.95 | -0.23  | 0.12    | Depression Symptoms |
| WaitingList - TimeT0 | -0.85    | 0.66 | 115     | -1.28   | 1            | -0.11 | 0.95 | -0.30  | 0.06    | Anxiety Symptoms    |
| WaitingList – TimeT1 | 0.85     | 0.66 | 115     | 1.28    | 1            | 0.11  | 0.95 | -0.06  | 0.30    | Anxiety Symptoms    |
| WaitingList – TimeT2 | 0.25     | 0.67 | 115.40  | 0.37    | 1            | 0.03  | 0.95 | -0.14  | 0.21    | Anxiety Symptoms    |
| TimeT0 – TimeT1      | 1.70     | 0.66 | 115     | 2.56    | 0.07         | 0.23  | 0.95 | 0.05   | 0.42    | Anxiety Symptoms    |
| TimeT0 - TimeT2      | 1.10     | 0.67 | 115.401 | 1.63    | 0.62         | 0.15  | 0.95 | -0.03  | 0.33    | Anxiety Symptoms    |
| TimeT1 – TimeT2      | -0.60    | 0.67 | 115.40  | -0.88   | 1            | -0.08 | 0.95 | -0.26  | 0.10    | Anxiety Symptoms    |
| WaitingList - TimeT0 | -0.35    | 1.13 | 115     | -0.30   | 1            | -0.02 | 0.95 | -0.21  | 0.15    | Stress Symptoms     |
| WaitingList – TimeT1 | 3.70     | 1.13 | 115     | 3.25    | <b>0.008</b> | 0.30  | 0.95 | 0.11   | 0.48    | Stress Symptoms     |
| WaitingList – TimeT2 | 2.88     | 1.15 | 115.33  | 2.49    | 0.08         | 0.23  | 0.95 | 0.04   | 0.41    | Stress Symptoms     |
| TimeT0 – TimeT1      | 4.05     | 1.13 | 115     | 3.56    | <b>0.003</b> | 0.33  | 0.95 | 0.14   | 0.51    | Stress Symptoms     |
| TimeT0 – TimeT2      | 3.23     | 1.15 | 115.33  | 2.79    | <b>0.036</b> | 0.26  | 0.95 | 0.07   | 0.44    | Stress Symptoms     |
| TimeT1 – TimeT2      | -0.82    | 1.15 | 115.33  | -0.71   | 1            | -0.06 | 0.95 | -0.24  | 0.11    | Stress Symptoms     |
| WaitingList - TimeT0 | -0.65    | 1.14 | 115     | -0.56   | 1            | -0.05 | 0.95 | -0.23  | 0.12    | General distress    |

|                      |       |      |        |       |                   |       |      |       |       |                                |
|----------------------|-------|------|--------|-------|-------------------|-------|------|-------|-------|--------------------------------|
| WaitingList – TimeT1 | 3.82  | 1.14 | 115    | 3.35  | <b>0.006</b>      | 0.31  | 0.95 | 0.12  | 0.49  | General distress               |
| WaitingList – TimeT2 | 2.70  | 1.16 | 115.29 | 2.32  | 0.12              | 0.21  | 0.95 | 0.03  | 0.40  | General distress               |
| TimeT0 – TimeT1      | 4.47  | 1.14 | 115    | 3.92  | <b>&gt; 0.001</b> | 0.36  | 0.95 | 0.17  | 0.55  | General distress               |
| TimeT0 – TimeT2      | 3.35  | 1.16 | 115.29 | 2.88  | <b>0.027</b>      | 0.26  | 0.95 | 0.08  | 0.45  | General distress               |
| Time7 – TimeT2       | -1.12 | 1.16 | 115.29 | -0.96 | 1                 | -0.09 | 0.95 | -0.27 | 0.09  | General distress               |
| WaitingList - TimeT0 | -0.47 | 0.86 | 115    | -0.54 | 1                 | -0.05 | 0.95 | -0.23 | 0.13  | Perceived stress level         |
| WaitingList – TimeT1 | 2.22  | 0.86 | 115    | 2.56  | 0.07              | 0.23  | 0.95 | 0.05  | 0.42  | Perceived stress level         |
| WaitingList – TimeT2 | 2.11  | 0.88 | 115.33 | 2.39  | 0.11              | 0.22  | 0.95 | 0.03  | 0.40  | Perceived stress level         |
| TimeT0 - Time7       | 2.70  | 0.86 | 115    | 3.10  | <b>0.014</b>      | 0.28  | 0.95 | 0.09  | 0.47  | Perceived stress level         |
| TimeT0 – TimeT2      | 2.59  | 0.88 | 115.33 | 2.93  | <b>0.024</b>      | 0.27  | 0.95 | 0.08  | 0.45  | Perceived stress level         |
| TimeT1- TimeT2       | -0.11 | 0.88 | 115.33 | -0.12 | 1                 | -0.01 | 0.95 | -0.19 | 0.17  | Perceived stress level         |
| WaitingList - TimeT0 | -0.02 | 0.94 | 115    | -0.02 | 1                 | -0.00 | 0.95 | -0.18 | 0.18  | Perceived social connectedness |
| WaitingList – TimeT1 | -2.70 | 0.94 | 115    | -2.85 | <b>0.030</b>      | -0.26 | 0.95 | -0.45 | -0.08 | Perceived social connectedness |
| WaitingList – TimeT2 | -2.78 | 0.96 | 115.30 | -2.89 | <b>0.026</b>      | -0.26 | 0.95 | -0.45 | -0.08 | Perceived social connectedness |
| TimeT0 – TimeT1      | -2.67 | 0.94 | 115    | -2.83 | <b>0.032</b>      | -0.26 | 0.95 | -0.44 | -0.07 | Perceived social connectedness |
| Time0 – TimeT2       | -2.76 | 0.96 | 115.30 | -2.87 | <b>0.029</b>      | -0.26 | 0.95 | -0.45 | -0.08 | Perceived social connectedness |
| TimeT1 – TimeT2      | -0.08 | 0.96 | 115.30 | -0.08 | 1                 | -0.00 | 0.95 | -0.19 | 0.17  | Perceived social connectedness |
| WaitingList - TimeT0 | 0.40  | 0.31 | 115    | 1.27  | 1                 | 0.11  | 0.95 | -0.06 | 0.30  | Perceived hopelessness         |
| WaitingList – TimeT1 | 1.15  | 0.31 | 115    | 3.67  | <b>0.002</b>      | 0.34  | 0.95 | 0.15  | 0.52  | Perceived hopelessness         |
| WaitingList – TimeT2 | 0.33  | 0.31 | 115.14 | 1.03  | 1                 | 0.09  | 0.95 | -0.08 | 0.27  | Perceived hopelessness         |
| TimeT0 – TimeT1      | 0.75  | 0.31 | 115    | 2.39  | 0.10              | 0.22  | 0.95 | 0.03  | 0.40  | Perceived hopelessness         |
| Time0 - Time21       | -0.07 | 0.31 | 115.14 | -0.22 | 1                 | -0.02 | 0.95 | -0.20 | 0.16  | Perceived hopelessness         |
| Time7 - Time21       | -0.82 | 0.31 | 115.14 | -2.57 | 0.06              | -0.23 | 0.95 | -0.42 | -0.05 | Perceived hopelessness         |

|                      |       |      |        |       |              |       |      |       |      |                     |
|----------------------|-------|------|--------|-------|--------------|-------|------|-------|------|---------------------|
| WaitingList - Time0  | 0.80  | 0.47 | 115    | 1.68  | 0.57         | 0.15  | 0.95 | -0.02 | 0.34 | Fear of Coronavirus |
| WaitingList - Time7  | 1.67  | 0.47 | 115    | 3.51  | <b>0.003</b> | 0.32  | 0.95 | 0.13  | 0.51 | Fear of Coronavirus |
| WaitingList - Time21 | 1.48  | 0.48 | 115.13 | 3.05  | <b>0.016</b> | 0.28  | 0.95 | 0.09  | 0.47 | Fear of Coronavirus |
| Time0 - Time7        | 875   | 0.47 | 115    | 1.83  | 0.41         | 0.17  | 0.95 | -0.01 | 0.35 | Fear of Coronavirus |
| Time0 - Time21       | 0.68  | 0.48 | 115.13 | 1.39  | 0.98         | 0.13  | 0.95 | -0.05 | 0.31 | Fear of Coronavirus |
| Time7 - Time21       | -0.20 | 0.48 | 115.13 | -0.40 | 1            | -0.03 | 0.95 | -0.22 | 0.14 | Fear of Coronavirus |
